# Supplementary material
Source: PubMed Central journal article supplement (PMC4341550)
Supplement: ncomms5392-s1.pdf [file ncomms5392-s1.pdf]

a

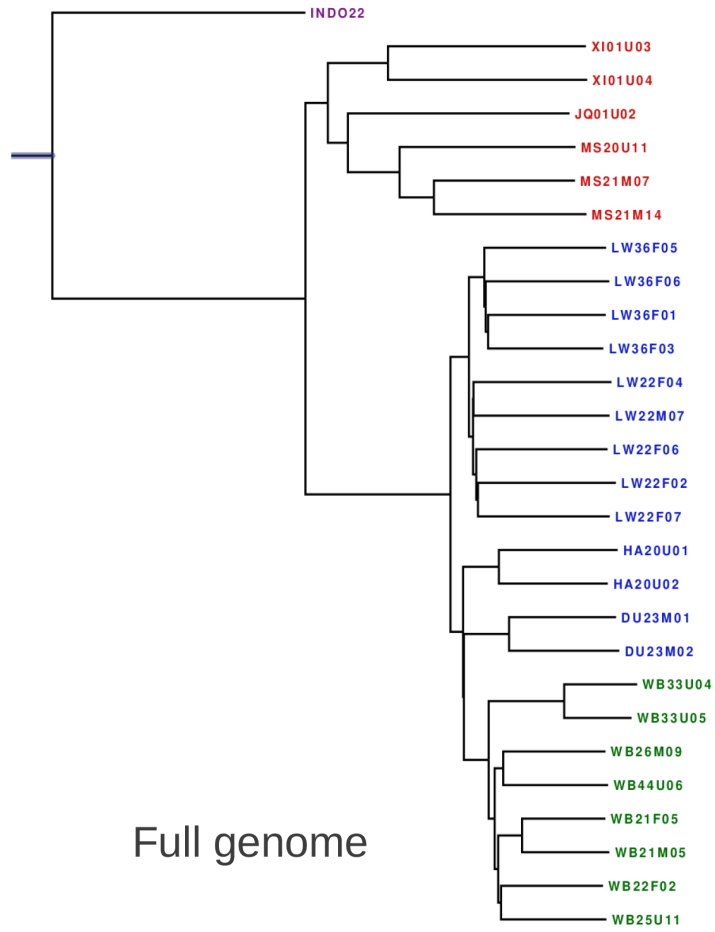

b

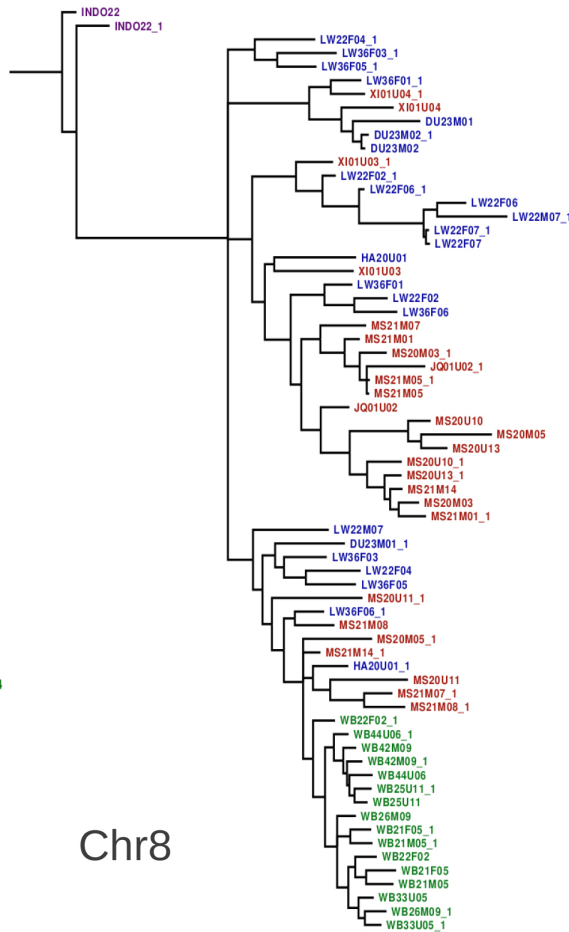

c

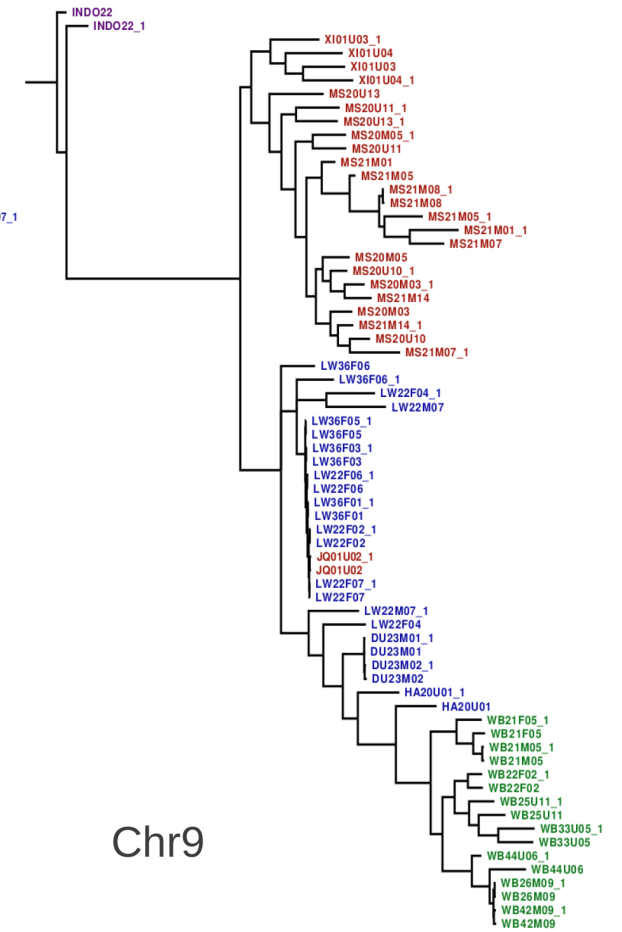

**Supplementary Figure 1. Bayesian trees for haplotypes covering the two largest regions of introgression.** Coloration is based on the three different pig groups: Asian domesticated pigs (orange), European wild boars (green) and European domesticated pigs (blue). All individuals that are included in the pairwise comparisons as described in the methods section are included. S1a. Phylogenetic tree based on all markers in the dataset. S1b. Tree based on the introgression region on chromosome 8 ( $rIBD > 0$ ). Each individual has two haplotypes in the tree. S1c. Tree based on the introgression region on chromosome 9 ( $rIBD > 0$ ). Each individual has two haplotypes in the tree.

**a**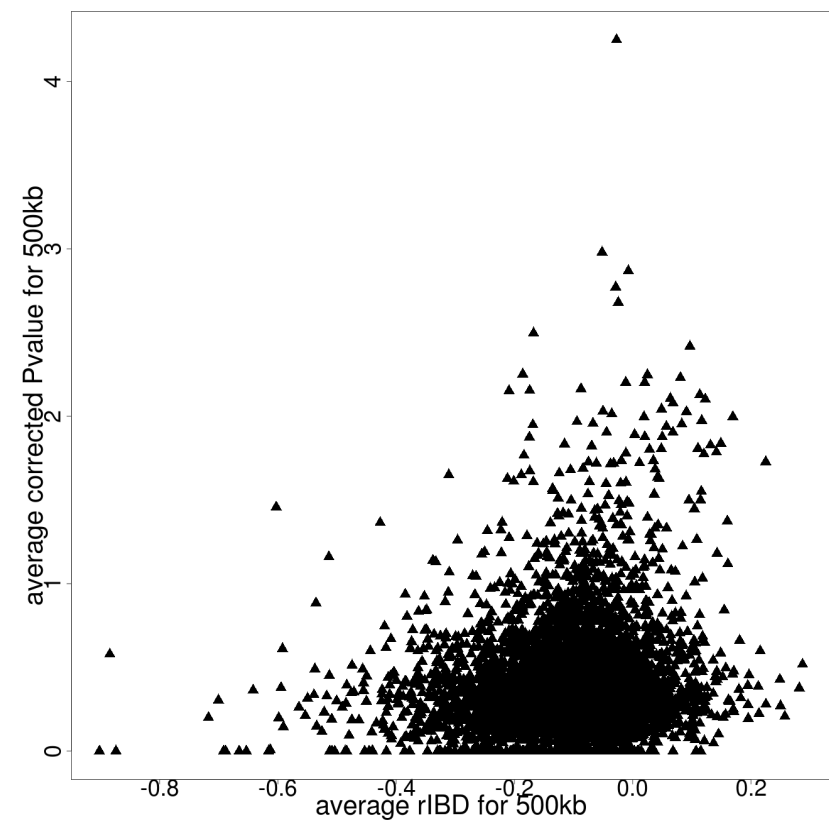**b**

iHS LW22 vs reference panel

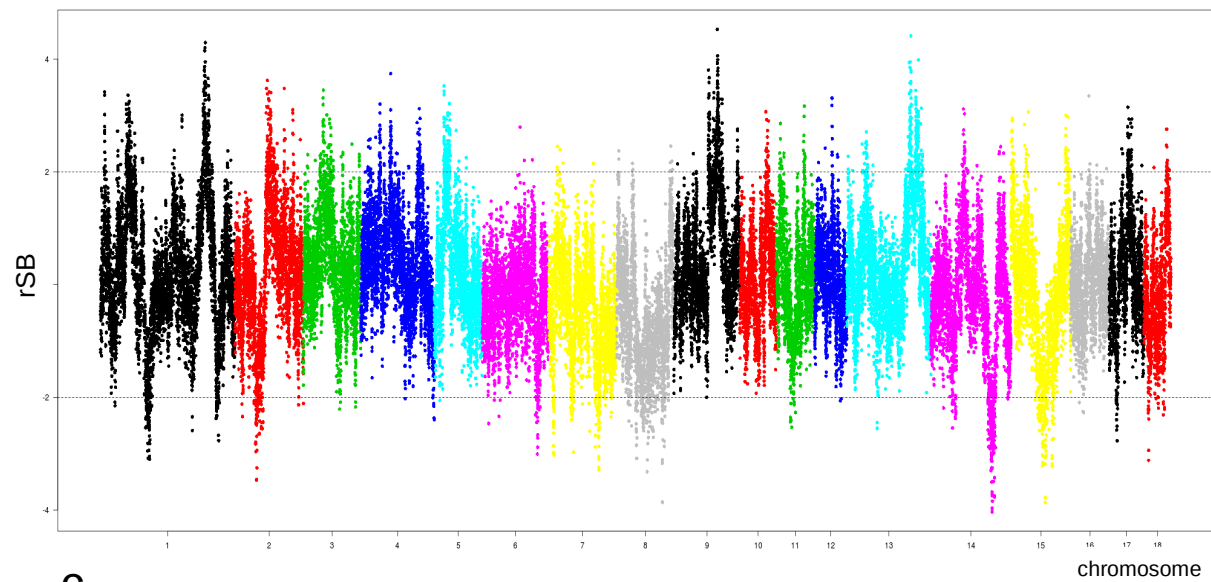**c**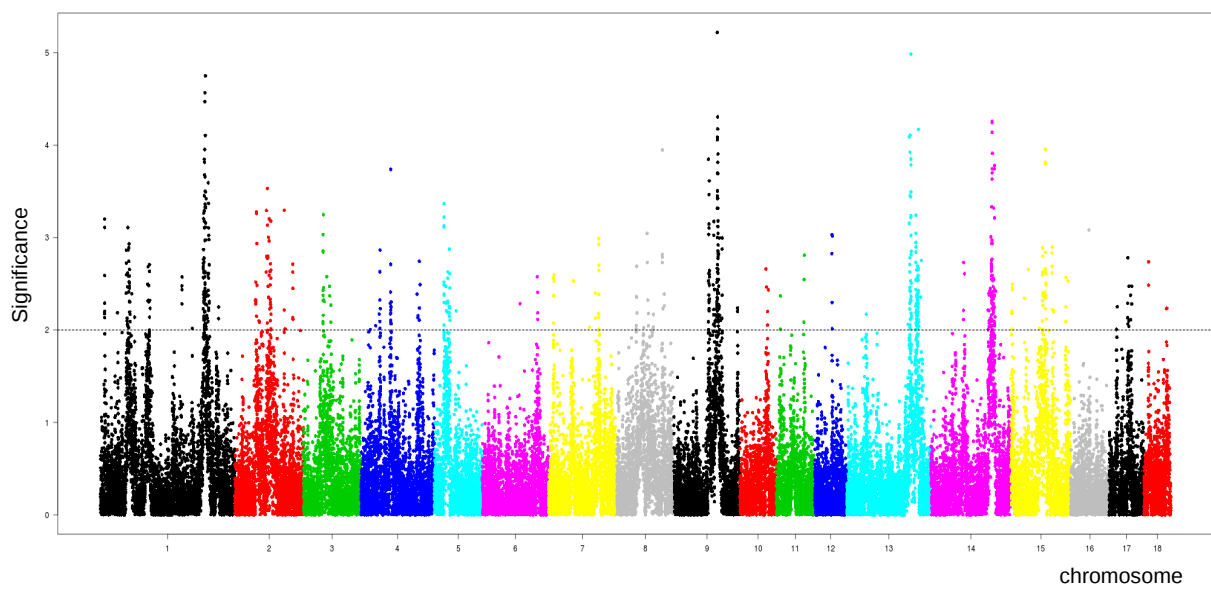

**Supplementary Figure 2. Signatures of selection based on EHH in Large White.** Regions of extended haplotype homozygosity within 56 LW individuals are identified for each chromosome. S2a. Correlation between iHS significance signals (y-axis) and rIBD signals (x-axis) in LW, averaged over 500kb. S2b. The iHS signals in LW are polarized with iHS signals in a reference panel of 4 other European breeds, resulting in rSB (standardized ratio of iES). S2c. Significance of the rSB signals in LW for each chromosome.

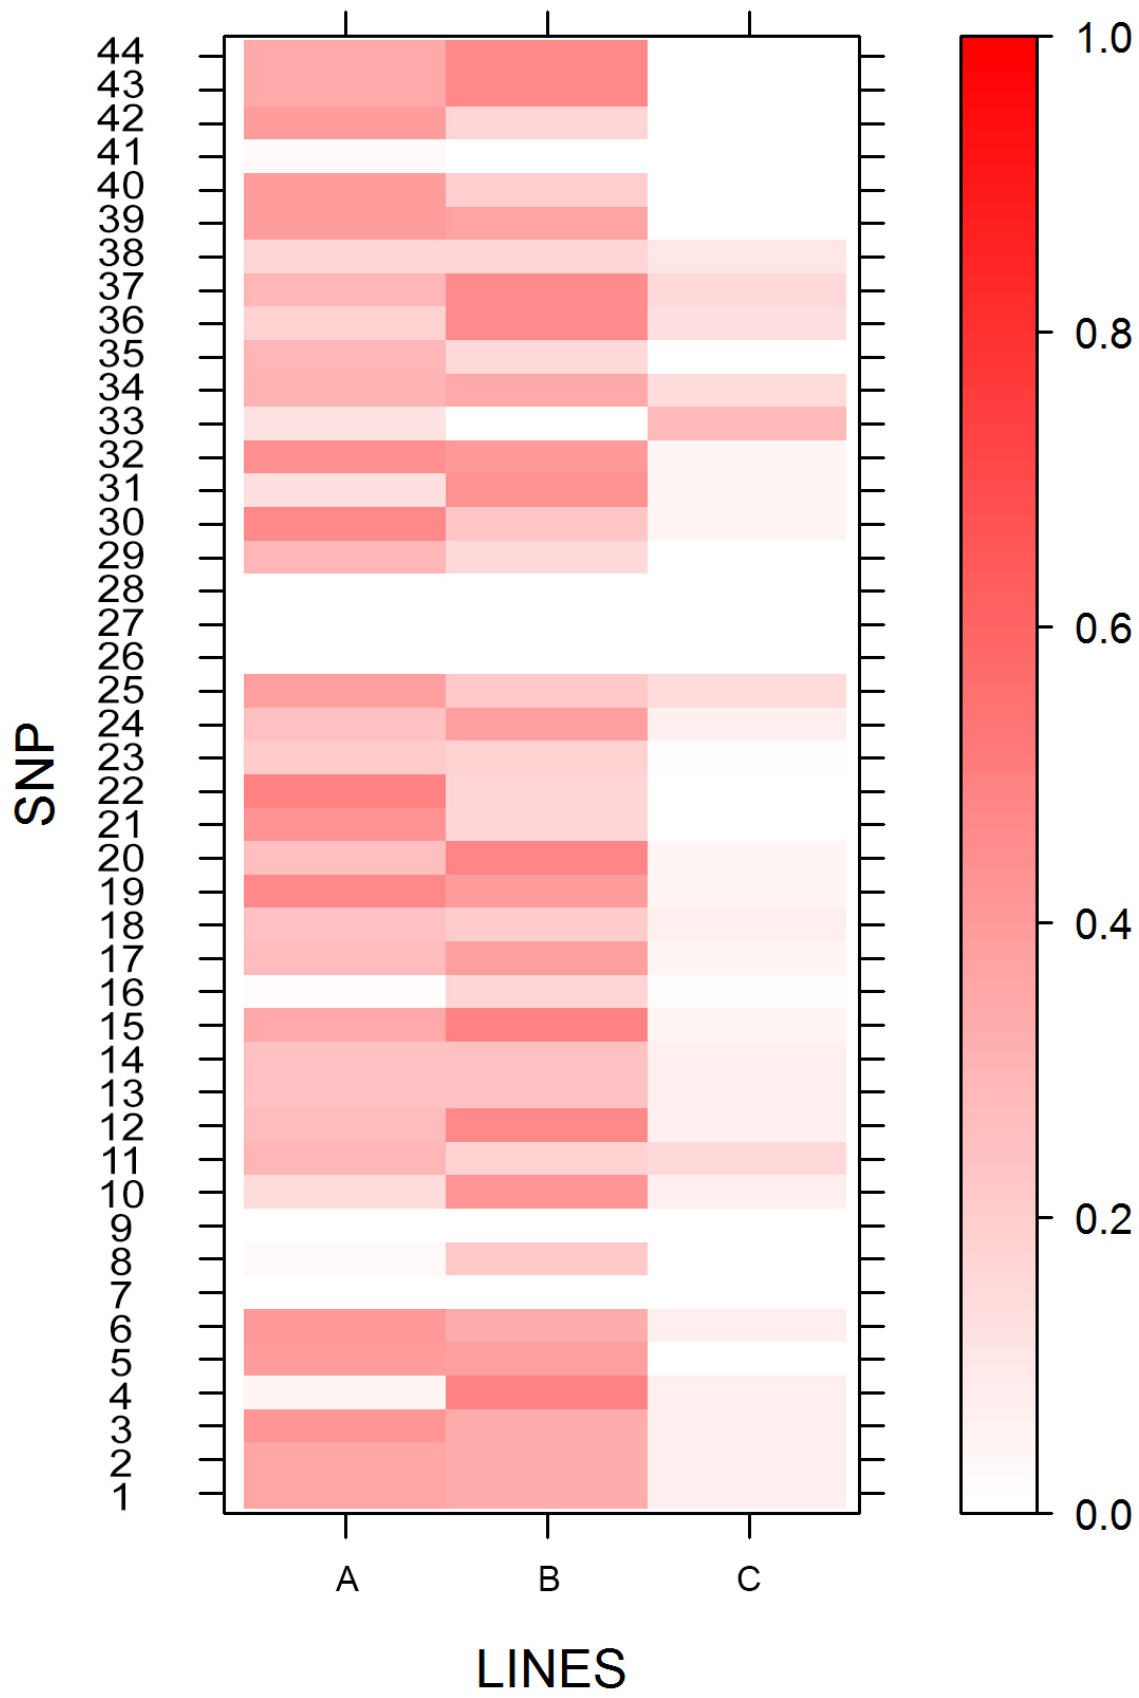

**Supplementary Figure 3. Allele frequencies for markers surrounding the introgression region on chromosome 8.** Allele frequencies are displayed for each 60K marker (44 total) that lies within the longest introgression region on chromosome 8. Frequencies are calculate for two reproduction-associated lines (line A, N=1053 and Line B, N=568) and one growth-associated line (Line C, N=965).

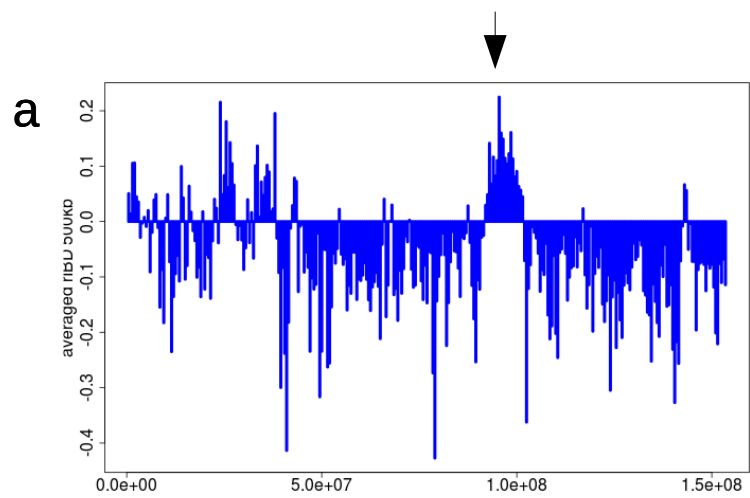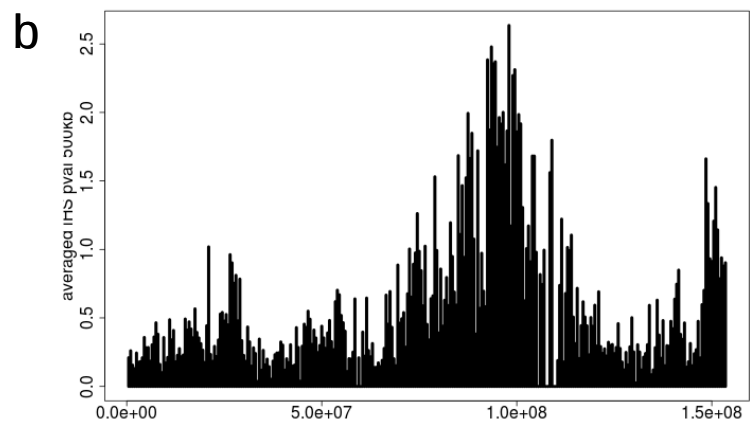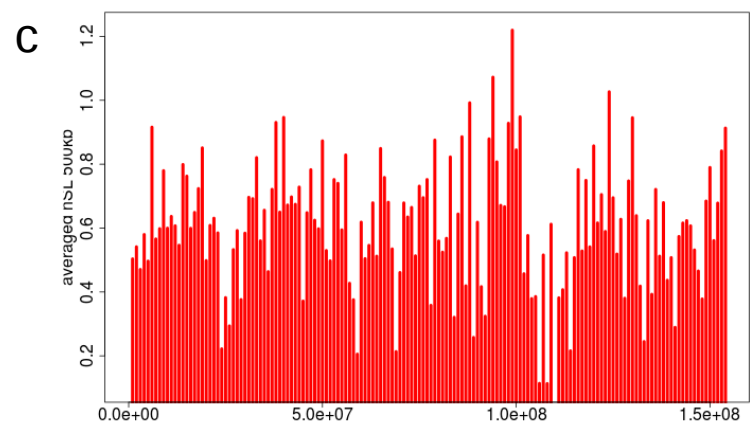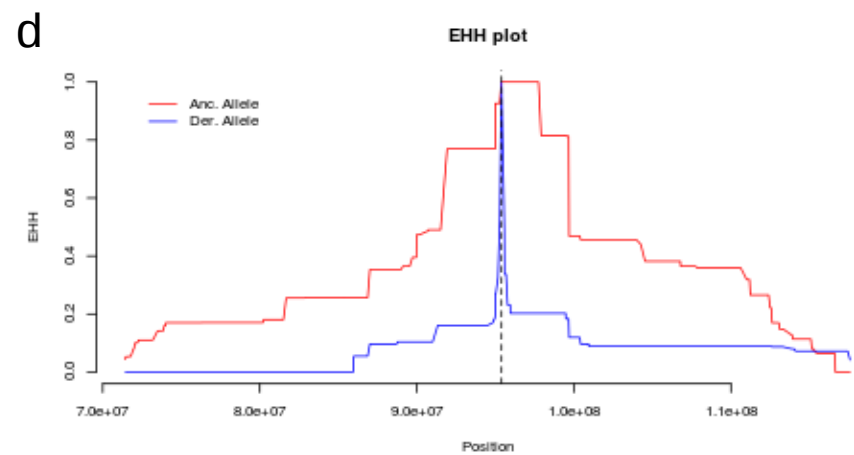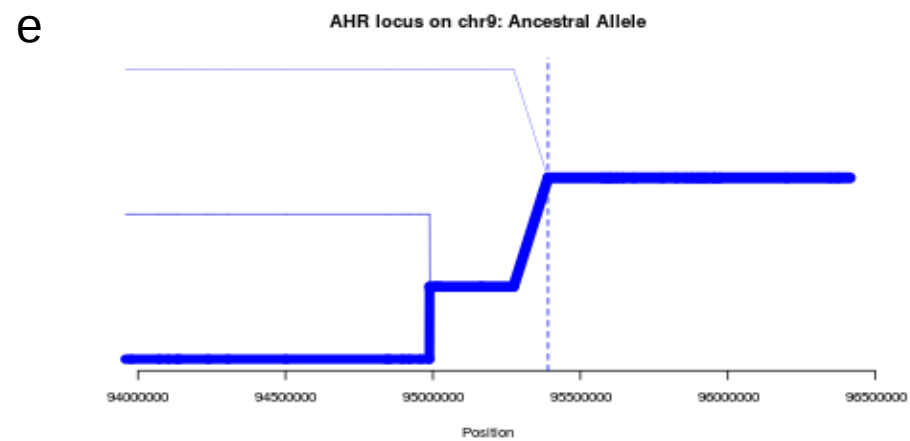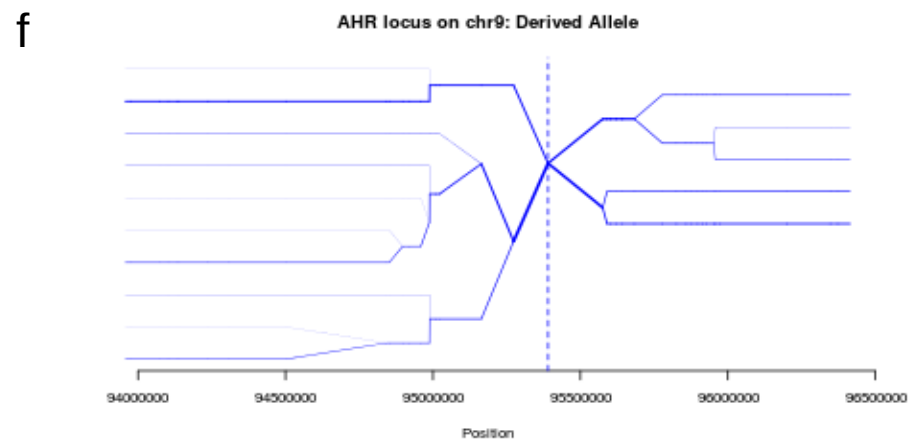

**Supplementary Figure 4. Extended haplotype homozygosity in Large White at the *AHR* locus.**

Regions of extended haplotype homozygosity within 56 Large White individuals are identified for chromosome 9. S4a. The distribution of rIBD in LW over the full length of chromosome 9. The *AHR* locus is indicated with an arrow, resulting in the highest peak of rIBD. S4b. Significance of the iHS signals in LW for chromosome 9, averaged over 500kb. S4c. Significance of the nSL signals in LW for chromosome 9, averaged over 500kb. S4d. Extended haplotype homozygosity of the ancestral allele in LW at the *AHR* locus. S4e-f. Bifurcation diagrams of the breakdown of LD at increasing distance from the *AHR* locus.



Supplementary table 1

| <b>Origin</b> | <b>Groups</b> | <b>Individual</b> | <b>average coverage</b> | <b>usage</b>       |
|---------------|---------------|-------------------|-------------------------|--------------------|
| Euro breed    | Duroc         | DU23M01           | 10.885                  | Phasing            |
| Euro breed    | Duroc         | DU23M02           | 11.776                  | Phasing            |
| Euro breed    | Duroc         | DU23M03           | 6.206                   | Phasing            |
| Euro breed    | Duroc         | DU23M04           | 7.759                   | Phasing            |
| Euro breed    | Hampshire     | HA20U01           | 11.646                  | Phasing            |
| Euro breed    | Hampshire     | HA20U02           | 10.299                  | Phasing            |
| Euro breed    | Landrace1     | LR21M03           | 9.548                   | Phasing            |
| Euro breed    | Landrace2     | LR24F01           | 13.917                  | Phasing            |
| Euro breed    | Landrace2     | LR24F08           | 9.213                   | Phasing            |
| Euro breed    | Landrace3     | LR30F02           | 7.604                   | Phasing            |
| Euro breed    | Landrace3     | LR30F03           | 7.782                   | Phasing            |
| Euro breed    | Large White 1 | LW22M04           | 9.771                   | Phasing + analysis |
| Euro breed    | Large White 1 | LW22M07           | 10.642                  | Phasing + analysis |
| Euro breed    | Large White 1 | LW22F01           | 5.888                   | Phasing + analysis |
| Euro breed    | Large White 1 | LW22F02           | 10.318                  | Phasing + analysis |
| Euro breed    | Large White 1 | LW22F03           | 10.316                  | Phasing + analysis |
| Euro breed    | Large White 1 | LW22F04           | 10.338                  | Phasing + analysis |
| Euro breed    | Large White 1 | LW22F06           | 9.547                   | Phasing + analysis |
| Euro breed    | Large White 1 | LW22F07           | 11.790                  | Phasing + analysis |
| Euro breed    | Large White 2 | LW36F01           | 10.070                  | Phasing + analysis |
| Euro breed    | Large White 2 | LW36F02           | 8.633                   | Phasing + analysis |
| Euro breed    | Large White 2 | LW36F03           | 9.004                   | Phasing + analysis |
| Euro breed    | Large White 2 | LW36F04           | 9.576                   | Phasing + analysis |
| Euro breed    | Large White 2 | LW36F05           | 8.737                   | Phasing + analysis |
| Euro breed    | Large White 2 | LW36F06           | 8.820                   | Phasing + analysis |
| Euro breed    | Pietrain      | PI21F02           | 10.760                  | Phasing            |
| Euro breed    | Pietrain      | PI21F06           | 10.783                  | Phasing            |
| Euro breed    | Pietrain      | PI21M17           | 8.671                   | Phasing            |
| Euro breed    | Pietrain      | PI21M20           | 5.931                   | Phasing            |
| Euro breed    | Pietrain      | PI21M21           | 11.435                  | Phasing            |
| Asia breed    | Jianquhai     | JQ01U02           | 10.746                  | Phasing + analysis |
| Asia breed    | Meishan1      | MS20M03           | 10.331                  | Phasing            |
| Asia breed    | Meishan1      | MS20M05           | 10.457                  | Phasing            |
| Asia breed    | Meishan1      | MS20U10           | 9.410                   | Phasing            |
| Asia breed    | Meishan1      | MS20U11           | 9.398                   | Phasing + analysis |
| Asia breed    | Meishan1      | MS20U13           | 7.782                   | Phasing            |
| Asia breed    | Meishan2      | MS21M01           | 8.653                   | Phasing            |
| Asia breed    | Meishan2      | MS21M05           | 10.610                  | Phasing            |
| Asia breed    | Meishan2      | MS21M07           | 8.995                   | Phasing + analysis |
| Asia breed    | Meishan2      | MS21M08           | 9.013                   | Phasing            |
| Asia breed    | Meishan2      | MS21M14           | 10.429                  | Phasing + analysis |
| Asia breed    | Xiang         | XI01U03           | 9.247                   | Phasing + analysis |
| Asia breed    | Xiang         | XI01U04           | 9.082                   | Phasing + analysis |
| Euro wild     | Dutch wild1   | WB21F03           | 10.559                  | Phasing            |

Supplementary table 1

|           |               |         |        |                    |
|-----------|---------------|---------|--------|--------------------|
| Euro wild | Dutch wild1   | WB21F04 | 12.613 | Phasing            |
| Euro wild | Dutch wild1   | WB21F05 | 9.406  | Phasing + analysis |
| Euro wild | Dutch wild1   | WB21M03 | 11.663 | Phasing            |
| Euro wild | Dutch wild1   | WB21M05 | 15.245 | Phasing + analysis |
| Euro wild | Dutch wild2   | WB22F01 | 5.725  | Phasing            |
| Euro wild | Dutch wild2   | WB22F02 | 8.167  | Phasing + analysis |
| Euro wild | Dutch wild2   | WB22F03 | 9.429  | Phasing            |
| Euro wild | Dutch wild2   | WB22F04 | 9.022  | Phasing            |
| Euro wild | Dutch wild2   | WB22M03 | 11.907 | Phasing            |
| Euro wild | French wild   | WB25U11 | 9.622  | Phasing + analysis |
| Euro wild | Swiss wild    | WB26M09 | 14.618 | Phasing + analysis |
| Euro wild | Samos wild    | WB33U04 | 11.524 | Phasing + analysis |
| Euro wild | Samos wild    | WB33U05 | 10.318 | Phasing + analysis |
| Euro wild | Italian wild  | WB42U06 | 12.674 | Phasing            |
| Euro wild | Italian wild  | WB44U06 | 12.158 | Phasing + analysis |
| Euro wild | Italian wild  | WB44U07 | 10.721 | Phasing            |
| Asia wild | Japanese wild | WB20U02 | 11.315 | Phasing            |
| Asia wild | Chinese wild1 | WB29U04 | 5.492  | Phasing            |
| Asia wild | Chinese wild1 | WB29U12 | 10.385 | Phasing            |
| Asia wild | Chinese wild1 | WB29U14 | 9.035  | Phasing            |
| Asia wild | Chinese wild1 | WB29U16 | 12.772 | Phasing            |
| Asia wild | Chinese wild2 | WB30U01 | 5.405  | Phasing            |
| Asia wild | Chinese wild2 | WB30U08 | 10.092 | Phasing            |
| Asia wild | Chinese wild2 | WB30U09 | 11.846 | Phasing            |
| Outgroup  | Sumatra wild  | INDO22  | 11.494 | Phasing + outgroup |
| Outgroup  | Sumatra wild  | INDO33  | 11.155 | Phasing            |

**Supplementary Table 1. Overview of re-sequenced individuals that are used in the experiment.**

The origin of each sample is shown in the column "Origin" and the breed name or geographical region of the population is found in the column "Groups". The usage of each individual in the experiment is explained in the column "Usage" where "phasing" represents individuals that are used only for phasing the data, and "analysis" means that they were also used for pairwise IBD comparisons.

Supplementary table 2

| Chromosome | start    | stop     | Length (ZrIBD>2) | genes    |  |          |          |
|------------|----------|----------|------------------|----------|--|----------|----------|
| Ssc10_2_1  | 4090000  | 4100000  | 10000            |          |  |          |          |
| Ssc10_2_1  | 6840000  | 6860000  | 20000            |          |  |          |          |
| Ssc10_2_1  | 7550000  | 7640000  | 90000            |          |  |          |          |
| Ssc10_2_1  | 7710000  | 7720000  | 10000            |          |  |          |          |
| Ssc10_2_1  | 27170000 | 27190000 | 20000            |          |  |          |          |
| Ssc10_2_1  | 28540000 | 28700000 | 160000           | REPS1    |  | C6ORF115 |          |
| Ssc10_2_1  | 29650000 | 29660000 | 10000            |          |  |          |          |
| Ssc10_2_1  | 29670000 | 29700000 | 30000            |          |  |          |          |
| Ssc10_2_1  | 30780000 | 30800000 | 20000            |          |  |          |          |
| Ssc10_2_1  | 30810000 | 30860000 | 50000            |          |  |          |          |
| Ssc10_2_1  | 30880000 | 30970000 | 90000            |          |  |          |          |
| Ssc10_2_1  | 31090000 | 31130000 | 40000            |          |  |          |          |
| Ssc10_2_1  | 31190000 | 31200000 | 10000            |          |  |          |          |
| Ssc10_2_1  | 31790000 | 31840000 | 50000            |          |  |          |          |
| Ssc10_2_1  | 32020000 | 32310000 | 290000           | MYB      |  | AHI1     |          |
| Ssc10_2_1  | 32410000 | 32440000 | 30000            |          |  |          |          |
| Ssc10_2_1  | 32620000 | 32630000 | 10000            |          |  |          |          |
| Ssc10_2_1  | 52110000 | 52280000 | 170000           | EYS      |  |          |          |
| Ssc10_2_1  | 53390000 | 53760000 | 370000           |          |  |          |          |
| Ssc10_2_1  | 54040000 | 54080000 | 40000            |          |  |          |          |
| Ssc10_2_1  | 56830000 | 57020000 | 190000           | C6orf57  |  | FAM135A  |          |
| Ssc10_2_1  | 71440000 | 71470000 | 30000            |          |  |          |          |
| Ssc10_2_1  | 71480000 | 71510000 | 30000            |          |  |          |          |
| Ssc10_2_1  | 71530000 | 71540000 | 10000            |          |  |          |          |
| Ssc10_2_1  | 71610000 | 71640000 | 30000            |          |  |          |          |
| Ssc10_2_1  | 74270000 | 74390000 | 120000           | POU3F2   |  |          |          |
| Ssc10_2_1  | 77060000 | 77160000 | 100000           | GRIK2    |  |          |          |
| Ssc10_2_1  | 77170000 | 77210000 | 40000            |          |  |          |          |
| Ssc10_2_1  | 81970000 | 82020000 | 50000            | AIM1     |  |          |          |
| Ssc10_2_1  | 83100000 | 83110000 | 10000            | SCML4    |  |          |          |
| Ssc10_2_1  | 84510000 | 84520000 | 10000            |          |  |          |          |
| Ssc10_2_1  | 84550000 | 84600000 | 50000            | CEP57L1  |  |          |          |
| Ssc10_2_1  | 84870000 | 84890000 | 20000            | AKD1     |  |          |          |
| Ssc10_2_1  | 84970000 | 84990000 | 20000            | AKD1     |  |          |          |
| Ssc10_2_1  | 85040000 | 85060000 | 20000            |          |  |          |          |
| Ssc10_2_1  | 85520000 | 85640000 | 120000           | WASF1    |  |          |          |
| Ssc10_2_1  | 86090000 | 86120000 | 30000            |          |  |          |          |
| Ssc10_2_1  | 86140000 | 86910000 | 770000           | GTF3C6   |  | CDK19    | RPF2     |
|            |          |          |                  | AMD1     |  | REV3L    | KIAA1919 |
|            |          |          |                  | SLC16A10 |  |          |          |
| Ssc10_2_1  | 87040000 | 87060000 | 20000            | TRAF3IP2 |  |          |          |
| Ssc10_2_1  | 87400000 | 87530000 | 130000           |          |  |          |          |
| Ssc10_2_1  | 87540000 | 87570000 | 30000            |          |  |          |          |
| Ssc10_2_1  | 90300000 | 90340000 | 40000            |          |  |          |          |

Supplementary table 2

|            |           |           |        |          |            |
|------------|-----------|-----------|--------|----------|------------|
| Ssc10_2_1  | 90640000  | 90730000  | 90000  |          |            |
| Ssc10_2_1  | 91830000  | 91880000  | 50000  | NT5DC1   |            |
| Ssc10_2_1  | 92080000  | 92240000  | 160000 |          |            |
| Ssc10_2_1  | 92460000  | 92540000  | 80000  | SULT2B1  |            |
| Ssc10_2_1  | 92840000  | 92890000  | 50000  |          |            |
| Ssc10_2_1  | 92900000  | 93420000  | 520000 | RWDD2A   | PRSS35 ME1 |
|            |           |           |        | PGM3     | DOPEY1     |
| Ssc10_2_1  | 93450000  | 93540000  | 90000  | UBE3D    | TSPAN13    |
| Ssc10_2_1  | 94010000  | 94270000  | 260000 |          |            |
| Ssc10_2_1  | 97970000  | 97990000  | 20000  |          |            |
| Ssc10_2_1  | 98040000  | 98090000  | 50000  | IRAK1BP1 |            |
| Ssc10_2_1  | 103820000 | 103930000 | 110000 |          |            |
| Ssc10_2_1  | 104740000 | 104870000 | 130000 |          |            |
| Ssc10_2_1  | 107740000 | 107880000 | 140000 |          |            |
| Ssc10_2_1  | 107910000 | 107920000 | 10000  |          |            |
| Ssc10_2_1  | 108000000 | 108020000 | 20000  |          |            |
| Ssc10_2_1  | 177280000 | 177340000 | 60000  | CDH20    |            |
| Ssc10_2_1  | 178680000 | 178690000 | 10000  |          |            |
| Ssc10_2_1  | 178700000 | 178730000 | 30000  |          |            |
| Ssc10_2_1  | 230010000 | 230030000 | 20000  |          |            |
| Ssc10_2_1  | 281820000 | 281830000 | 10000  |          |            |
| Ssc10_2_1  | 284430000 | 284510000 | 80000  | SAL1     |            |
| Ssc10_2_1  | 312000000 | 312010000 | 10000  |          |            |
| Ssc10_2_10 | 410000    | 420000    | 10000  |          |            |
| Ssc10_2_10 | 440000    | 450000    | 10000  |          |            |
| Ssc10_2_10 | 460000    | 480000    | 20000  |          |            |
| Ssc10_2_10 | 2290000   | 2310000   | 20000  | B3GALT2  |            |
| Ssc10_2_10 | 2320000   | 2330000   | 10000  |          |            |
| Ssc10_2_10 | 4200000   | 4210000   | 10000  |          |            |
| Ssc10_2_10 | 4360000   | 4400000   | 40000  |          |            |
| Ssc10_2_10 | 4410000   | 4420000   | 10000  |          |            |
| Ssc10_2_10 | 4430000   | 4440000   | 10000  |          |            |
| Ssc10_2_10 | 4480000   | 4780000   | 300000 |          |            |
| Ssc10_2_10 | 23740000  | 23750000  | 10000  |          |            |
| Ssc10_2_10 | 47760000  | 47770000  | 10000  |          |            |
| Ssc10_2_10 | 48260000  | 48310000  | 50000  |          |            |
| Ssc10_2_10 | 48370000  | 48420000  | 50000  |          |            |
| Ssc10_2_10 | 48550000  | 48630000  | 80000  | PTPLA    |            |
| Ssc10_2_10 | 50420000  | 50440000  | 20000  |          |            |
| Ssc10_2_10 | 50530000  | 50550000  | 20000  |          |            |
| Ssc10_2_11 | 8620000   | 8650000   | 30000  | FRY      |            |
| Ssc10_2_11 | 8700000   | 8720000   | 20000  | N4BP2L2  |            |
| Ssc10_2_11 | 25780000  | 25800000  | 20000  |          |            |
| Ssc10_2_11 | 25900000  | 25930000  | 30000  |          |            |
| Ssc10_2_12 | 680000    | 720000    | 40000  |          |            |

Supplementary table 2

|            |           |           |        |          |                  |
|------------|-----------|-----------|--------|----------|------------------|
| Ssc10_2_12 | 990000    | 1020000   | 30000  |          |                  |
| Ssc10_2_12 | 1030000   | 1180000   | 150000 | NPLOC4   | FASN C17orf70    |
|            |           |           |        | FSCN2    | BETA-ACTIN       |
| Ssc10_2_12 | 1230000   | 1380000   | 150000 | SLC38A10 |                  |
| Ssc10_2_12 | 1400000   | 1410000   | 10000  |          |                  |
| Ssc10_2_12 | 1420000   | 1500000   | 80000  | AATK     | C12H17orf56 AZI1 |
| Ssc10_2_12 | 1520000   | 1650000   | 130000 | CHMP6    | RPTOR            |
| Ssc10_2_12 | 1660000   | 1720000   | 60000  |          |                  |
| Ssc10_2_12 | 21660000  | 21670000  | 10000  | KRTAP1-3 |                  |
| Ssc10_2_12 | 21680000  | 21740000  | 60000  | KRT39    | KRTAP3-1         |
| Ssc10_2_12 | 25130000  | 25220000  | 90000  | IGF2BP1  |                  |
| Ssc10_2_12 | 25300000  | 25350000  | 50000  |          |                  |
| Ssc10_2_12 | 26800000  | 26820000  | 20000  | ACSF2    |                  |
| Ssc10_2_12 | 28440000  | 28460000  | 20000  |          |                  |
| Ssc10_2_12 | 41520000  | 41550000  | 30000  | NLE1     |                  |
| Ssc10_2_12 | 46340000  | 46380000  | 40000  |          |                  |
| Ssc10_2_12 | 53520000  | 53530000  | 10000  |          |                  |
| Ssc10_2_13 | 14220000  | 14290000  | 70000  | NGLY1    |                  |
| Ssc10_2_13 | 15470000  | 15520000  | 50000  | SLC4A7   |                  |
| Ssc10_2_13 | 16170000  | 16290000  | 120000 |          |                  |
| Ssc10_2_13 | 16670000  | 16720000  | 50000  |          |                  |
| Ssc10_2_13 | 29740000  | 29750000  | 10000  |          |                  |
| Ssc10_2_13 | 29800000  | 29810000  | 10000  |          |                  |
| Ssc10_2_13 | 45170000  | 45200000  | 30000  |          |                  |
| Ssc10_2_13 | 45210000  | 45240000  | 30000  |          |                  |
| Ssc10_2_13 | 53960000  | 54000000  | 40000  |          |                  |
| Ssc10_2_13 | 54030000  | 54050000  | 20000  |          |                  |
| Ssc10_2_13 | 61610000  | 61660000  | 50000  |          |                  |
| Ssc10_2_13 | 158690000 | 158700000 | 10000  |          |                  |
| Ssc10_2_13 | 170850000 | 170860000 | 10000  |          |                  |
| Ssc10_2_14 | 130000    | 150000    | 20000  | CDK20    |                  |
| Ssc10_2_14 | 180000    | 220000    | 40000  |          |                  |
| Ssc10_2_14 | 240000    | 250000    | 10000  |          |                  |
| Ssc10_2_14 | 9450000   | 9470000   | 20000  |          |                  |
| Ssc10_2_14 | 9510000   | 9520000   | 10000  |          |                  |
| Ssc10_2_14 | 11830000  | 11840000  | 10000  |          |                  |
| Ssc10_2_14 | 13330000  | 13380000  | 50000  | RPLP1    |                  |
| Ssc10_2_14 | 19320000  | 19340000  | 20000  |          |                  |
| Ssc10_2_14 | 25070000  | 25090000  | 20000  |          |                  |
| Ssc10_2_14 | 90970000  | 91000000  | 30000  |          |                  |
| Ssc10_2_15 | 7130000   | 7220000   | 90000  |          |                  |
| Ssc10_2_15 | 7690000   | 7750000   | 60000  |          |                  |
| Ssc10_2_15 | 9330000   | 9500000   | 170000 |          |                  |
| Ssc10_2_15 | 30010000  | 30230000  | 220000 |          |                  |
| Ssc10_2_15 | 33360000  | 33380000  | 20000  |          |                  |

Supplementary table 2

|            |           |           |        |        |         |        |
|------------|-----------|-----------|--------|--------|---------|--------|
| Ssc10_2_15 | 33390000  | 33450000  | 60000  |        |         |        |
| Ssc10_2_15 | 59950000  | 60170000  | 220000 | NRG1   |         |        |
| Ssc10_2_15 | 60290000  | 60300000  | 10000  |        |         |        |
| Ssc10_2_15 | 97710000  | 97860000  | 150000 | FRZB   | DNAJC10 |        |
| Ssc10_2_15 | 97900000  | 98380000  | 480000 | NUP35  | NCKAP1  | DUSP19 |
| Ssc10_2_15 | 119770000 | 119780000 | 10000  |        |         |        |
| Ssc10_2_15 | 119790000 | 119800000 | 10000  | VCL    |         |        |
| Ssc10_2_15 | 120330000 | 120510000 | 180000 |        |         |        |
| Ssc10_2_15 | 123770000 | 123880000 | 110000 |        |         |        |
| Ssc10_2_15 | 124040000 | 124200000 | 160000 | MAP2   |         |        |
| Ssc10_2_15 | 136610000 | 136620000 | 10000  |        |         |        |
| Ssc10_2_15 | 140000000 | 140010000 | 10000  |        |         |        |
| Ssc10_2_15 | 140790000 | 140800000 | 10000  |        |         |        |
| Ssc10_2_16 | 3500000   | 3510000   | 10000  |        |         |        |
| Ssc10_2_16 | 6130000   | 6140000   | 10000  |        |         |        |
| Ssc10_2_16 | 23150000  | 23160000  | 10000  |        |         |        |
| Ssc10_2_16 | 23170000  | 23220000  | 50000  |        |         |        |
| Ssc10_2_16 | 24940000  | 25000000  | 60000  |        |         |        |
| Ssc10_2_17 | 35900000  | 36040000  | 140000 | SMOX   |         |        |
| Ssc10_2_17 | 41500000  | 41530000  | 30000  | BPIFB4 |         |        |
| Ssc10_2_17 | 58300000  | 58340000  | 40000  |        |         |        |
| Ssc10_2_17 | 66810000  | 66820000  | 10000  |        |         |        |
| Ssc10_2_18 | 40000     | 50000     | 10000  |        |         |        |
| Ssc10_2_18 | 17560000  | 17580000  | 20000  |        |         |        |
| Ssc10_2_18 | 18370000  | 18410000  | 40000  |        |         |        |
| Ssc10_2_18 | 23950000  | 24210000  | 260000 |        |         |        |
| Ssc10_2_18 | 24630000  | 24800000  | 170000 | GPR37  |         |        |
| Ssc10_2_18 | 24920000  | 24940000  | 20000  |        |         |        |
| Ssc10_2_18 | 25070000  | 25100000  | 30000  |        |         |        |
| Ssc10_2_18 | 25130000  | 25140000  | 10000  |        |         |        |
| Ssc10_2_2  | 11330000  | 11370000  | 40000  | OSBP   |         |        |
| Ssc10_2_2  | 11390000  | 11410000  | 20000  |        |         |        |
| Ssc10_2_2  | 11440000  | 11450000  | 10000  | OR4D10 |         |        |
| Ssc10_2_2  | 11470000  | 11490000  | 20000  | OR5A2  |         |        |
| Ssc10_2_2  | 12620000  | 12640000  | 20000  | LDHB   |         |        |
| Ssc10_2_2  | 12990000  | 13140000  | 150000 | OR4K15 | OR4K1   | OR4L1  |
| Ssc10_2_2  | 13320000  | 13340000  | 20000  | PRG3   | PRG3    |        |
| Ssc10_2_2  | 24410000  | 24450000  | 40000  |        |         |        |
| Ssc10_2_2  | 24460000  | 24570000  | 110000 |        |         |        |
| Ssc10_2_2  | 33760000  | 33810000  | 50000  |        |         |        |
| Ssc10_2_2  | 33880000  | 33920000  | 40000  |        |         |        |
| Ssc10_2_2  | 33990000  | 34000000  | 10000  |        |         |        |
| Ssc10_2_2  | 34210000  | 34280000  | 70000  |        |         |        |
| Ssc10_2_2  | 34550000  | 34930000  | 380000 | KIF18A | METT5D1 |        |
| Ssc10_2_2  | 35310000  | 35320000  | 10000  |        |         |        |

Supplementary table 2

|           |           |           |        |          |          |         |
|-----------|-----------|-----------|--------|----------|----------|---------|
| Ssc10_2_2 | 36610000  | 36730000  | 120000 |          |          |         |
| Ssc10_2_2 | 40640000  | 40650000  | 10000  |          |          |         |
| Ssc10_2_2 | 42060000  | 42080000  | 20000  | NAV2     |          |         |
| Ssc10_2_2 | 42110000  | 42120000  | 10000  | DBX1     |          |         |
| Ssc10_2_2 | 42180000  | 42190000  | 10000  |          |          |         |
| Ssc10_2_2 | 50200000  | 50210000  | 10000  |          |          |         |
| Ssc10_2_2 | 67840000  | 67860000  | 20000  |          |          |         |
| Ssc10_2_2 | 68110000  | 68120000  | 10000  |          |          |         |
| Ssc10_2_2 | 68840000  | 68870000  | 30000  | OR7D4    | OR7D4    | ZNF846  |
| Ssc10_2_2 | 69110000  | 69360000  | 250000 | P2RY11   | COL5A3   | RDH8    |
|           |           |           |        | C3       | C19ORF66 | ANGPTL6 |
|           |           |           |        | PPAN     | EIF3G    | DNMT1   |
| Ssc10_2_2 | 69410000  | 69560000  | 150000 | ZGLP1    | ICAM1    | ICAM5   |
|           |           |           |        | ICAM6    | ZGLP1    | FDX1L   |
|           |           |           |        | RAVER1   | RAVER1   | ICAM-3  |
|           |           |           |        | TYK2     | CDC37    |         |
| Ssc10_2_2 | 69570000  | 69610000  | 40000  | PDE4A    |          |         |
| Ssc10_2_2 | 70060000  | 70090000  | 30000  | C19ORF52 | YIPF2    |         |
| Ssc10_2_2 | 86740000  | 86760000  | 20000  |          |          |         |
| Ssc10_2_2 | 86850000  | 86870000  | 20000  |          |          |         |
| Ssc10_2_2 | 86880000  | 86900000  | 20000  |          |          |         |
| Ssc10_2_2 | 86910000  | 87010000  | 100000 | IQGAP2   |          |         |
| Ssc10_2_2 | 88570000  | 88780000  | 210000 | AP3B1    |          |         |
| Ssc10_2_2 | 88910000  | 88930000  | 20000  |          |          |         |
| Ssc10_2_2 | 89280000  | 89300000  | 20000  |          |          |         |
| Ssc10_2_2 | 89320000  | 89370000  | 50000  | ARSB     |          |         |
| Ssc10_2_2 | 89500000  | 89530000  | 30000  |          |          |         |
| Ssc10_2_2 | 90480000  | 90490000  | 10000  |          |          |         |
| Ssc10_2_2 | 90500000  | 90520000  | 20000  | THBS4    |          |         |
| Ssc10_2_2 | 90580000  | 90620000  | 40000  |          |          |         |
| Ssc10_2_2 | 90890000  | 91020000  | 130000 | FAM151B  | ZFYVE16  |         |
| Ssc10_2_2 | 93160000  | 93260000  | 100000 |          |          |         |
| Ssc10_2_2 | 94090000  | 94110000  | 20000  |          |          |         |
| Ssc10_2_2 | 97000000  | 97080000  | 80000  |          |          |         |
| Ssc10_2_2 | 101260000 | 101330000 | 70000  |          |          |         |
| Ssc10_2_2 | 101590000 | 101640000 | 50000  |          |          |         |
| Ssc10_2_2 | 106910000 | 106960000 | 50000  | CAST     |          |         |
| Ssc10_2_2 | 107030000 | 107330000 | 300000 | ERAP2    | ERAP1    |         |
| Ssc10_2_2 | 107370000 | 107440000 | 70000  | IRAP     |          |         |
| Ssc10_2_2 | 107450000 | 107480000 | 30000  |          |          |         |
| Ssc10_2_2 | 107490000 | 107560000 | 70000  | LIX1     |          |         |
| Ssc10_2_2 | 107950000 | 107980000 | 30000  |          |          |         |
| Ssc10_2_2 | 108680000 | 108850000 | 170000 |          |          |         |
| Ssc10_2_2 | 110280000 | 110340000 | 60000  |          |          |         |
| Ssc10_2_2 | 110950000 | 111000000 | 50000  |          |          |         |



Supplementary table 2

|           |           |           |        |         |
|-----------|-----------|-----------|--------|---------|
| Ssc10_2_2 | 111340000 | 111370000 | 30000  |         |
| Ssc10_2_2 | 111380000 | 111560000 | 180000 |         |
| Ssc10_2_2 | 115770000 | 115810000 | 40000  |         |
| Ssc10_2_2 | 115980000 | 115990000 | 10000  |         |
| Ssc10_2_2 | 123230000 | 123240000 | 10000  |         |
| Ssc10_2_2 | 125130000 | 125360000 | 230000 | COMMD10 |
| Ssc10_2_2 | 125390000 | 125470000 | 80000  | SEMA6A  |
| Ssc10_2_2 | 125550000 | 125560000 | 10000  |         |
| Ssc10_2_2 | 125710000 | 125830000 | 120000 |         |
| Ssc10_2_2 | 125860000 | 125890000 | 30000  |         |
| Ssc10_2_2 | 126050000 | 126190000 | 140000 |         |
| Ssc10_2_2 | 126970000 | 127010000 | 40000  |         |
| Ssc10_2_2 | 127040000 | 127090000 | 50000  |         |
| Ssc10_2_2 | 127130000 | 127190000 | 60000  |         |
| Ssc10_2_2 | 127340000 | 127460000 | 120000 |         |
| Ssc10_2_2 | 127480000 | 127540000 | 60000  |         |
| Ssc10_2_2 | 127590000 | 127610000 | 20000  |         |
| Ssc10_2_2 | 127780000 | 127850000 | 70000  |         |
| Ssc10_2_2 | 127860000 | 127910000 | 50000  |         |
| Ssc10_2_2 | 128260000 | 128270000 | 10000  |         |
| Ssc10_2_2 | 129780000 | 129930000 | 150000 | PRR16   |
| Ssc10_2_2 | 129970000 | 130000000 | 30000  |         |
| Ssc10_2_2 | 130120000 | 130130000 | 10000  |         |
| Ssc10_2_2 | 130140000 | 130160000 | 20000  |         |
| Ssc10_2_2 | 130620000 | 130660000 | 40000  |         |
| Ssc10_2_2 | 130960000 | 131000000 | 40000  |         |
| Ssc10_2_2 | 132080000 | 132250000 | 170000 | CEP120  |
| Ssc10_2_2 | 132340000 | 132580000 | 240000 | CSNK1G3 |
| Ssc10_2_2 | 132590000 | 132720000 | 130000 |         |
| Ssc10_2_2 | 133010000 | 133020000 | 10000  |         |
| Ssc10_2_2 | 133030000 | 133080000 | 50000  |         |
| Ssc10_2_2 | 133120000 | 133170000 | 50000  |         |
| Ssc10_2_2 | 135910000 | 135920000 | 10000  |         |
| Ssc10_2_2 | 137320000 | 137330000 | 10000  |         |
| Ssc10_2_3 | 9960000   | 10150000  | 190000 | HSPB1   |
| Ssc10_2_3 | 12150000  | 12170000  | 20000  |         |
| Ssc10_2_3 | 14360000  | 14410000  | 50000  |         |
| Ssc10_2_3 | 14420000  | 14550000  | 130000 |         |
| Ssc10_2_3 | 22300000  | 22310000  | 10000  |         |
| Ssc10_2_3 | 29500000  | 29510000  | 10000  |         |
| Ssc10_2_3 | 29650000  | 29660000  | 10000  |         |
| Ssc10_2_3 | 29750000  | 29760000  | 10000  |         |
| Ssc10_2_3 | 29830000  | 29840000  | 10000  |         |
| Ssc10_2_3 | 30940000  | 30960000  | 20000  |         |
| Ssc10_2_3 | 31200000  | 31260000  | 60000  | SHISA9  |

Supplementary table 2

|           |           |           |        |                |                   |
|-----------|-----------|-----------|--------|----------------|-------------------|
| Ssc10_2_3 | 31660000  | 32110000  | 450000 |                |                   |
| Ssc10_2_3 | 59750000  | 59870000  | 120000 | RPIA           | IGKV1D-43         |
| Ssc10_2_3 | 59940000  | 59980000  | 40000  |                |                   |
| Ssc10_2_3 | 111220000 | 111240000 | 20000  |                |                   |
| Ssc10_2_3 | 111850000 | 111860000 | 10000  |                |                   |
| Ssc10_2_3 | 111870000 | 111900000 | 30000  |                |                   |
| Ssc10_2_3 | 111930000 | 111960000 | 30000  |                |                   |
| Ssc10_2_3 | 113210000 | 113250000 | 40000  | LTBP1          |                   |
| Ssc10_2_3 | 113520000 | 113530000 | 10000  |                |                   |
| Ssc10_2_3 | 113770000 | 113850000 | 80000  | TTC27          |                   |
| Ssc10_2_3 | 120350000 | 120390000 | 40000  |                |                   |
| Ssc10_2_3 | 120400000 | 120600000 | 200000 | DNMT3A         | DTNB              |
| Ssc10_2_3 | 121580000 | 121590000 | 10000  |                |                   |
| Ssc10_2_3 | 130800000 | 130830000 | 30000  |                |                   |
| Ssc10_2_4 | 60000     | 200000    | 140000 | ZNF250<br>ZNF7 | COMMD5<br>C8ORF33 |
| Ssc10_2_4 | 16550000  | 16570000  | 20000  |                |                   |
| Ssc10_2_4 | 43410000  | 43430000  | 20000  |                |                   |
| Ssc10_2_4 | 43460000  | 43560000  | 100000 | MTERFD1        | PTDSS1            |
| Ssc10_2_4 | 97150000  | 97170000  | 20000  | DEDD           | UFC1              |
| Ssc10_2_4 | 105310000 | 105330000 | 20000  |                |                   |
| Ssc10_2_4 | 110240000 | 110250000 | 10000  |                |                   |
| Ssc10_2_4 | 110800000 | 110830000 | 30000  |                |                   |
| Ssc10_2_4 | 111060000 | 111080000 | 20000  |                |                   |
| Ssc10_2_4 | 111230000 | 111240000 | 10000  | REG4           |                   |
| Ssc10_2_4 | 130770000 | 130790000 | 20000  |                |                   |
| Ssc10_2_4 | 130980000 | 130990000 | 10000  |                |                   |
| Ssc10_2_4 | 131000000 | 131020000 | 20000  |                |                   |
| Ssc10_2_4 | 132700000 | 132720000 | 20000  |                |                   |
| Ssc10_2_4 | 132770000 | 132800000 | 30000  |                |                   |
| Ssc10_2_4 | 135800000 | 135990000 | 190000 | FAM69A         |                   |
| Ssc10_2_4 | 138410000 | 138460000 | 50000  |                |                   |
| Ssc10_2_5 | 21250000  | 21260000  | 10000  | OR6C6          |                   |
| Ssc10_2_5 | 24950000  | 25030000  | 80000  |                |                   |
| Ssc10_2_5 | 25060000  | 25070000  | 10000  |                |                   |
| Ssc10_2_5 | 25130000  | 25320000  | 190000 |                |                   |
| Ssc10_2_5 | 35880000  | 35890000  | 10000  | MDM2           |                   |
| Ssc10_2_5 | 35900000  | 35930000  | 30000  |                |                   |
| Ssc10_2_5 | 93150000  | 93240000  | 90000  |                |                   |
| Ssc10_2_5 | 93330000  | 93380000  | 50000  |                |                   |
| Ssc10_2_6 | 30000     | 40000     | 10000  |                |                   |
| Ssc10_2_6 | 16030000  | 16040000  | 10000  |                |                   |
| Ssc10_2_6 | 16050000  | 16190000  | 140000 | NOB1           |                   |
| Ssc10_2_6 | 16730000  | 16760000  | 30000  | CIRH1A         |                   |
| Ssc10_2_6 | 16930000  | 16970000  | 40000  |                |                   |

Supplementary table 2

|           |           |           |        |         |           |         |
|-----------|-----------|-----------|--------|---------|-----------|---------|
| Ssc10_2_6 | 19010000  | 19030000  | 20000  |         |           |         |
| Ssc10_2_6 | 20230000  | 20260000  | 30000  |         |           |         |
| Ssc10_2_6 | 21210000  | 21230000  | 20000  |         |           |         |
| Ssc10_2_6 | 22850000  | 23020000  | 170000 |         |           |         |
| Ssc10_2_6 | 26420000  | 26460000  | 40000  | MT2A    | BBS2      |         |
| Ssc10_2_6 | 38340000  | 38430000  | 90000  |         |           |         |
| Ssc10_2_6 | 39160000  | 39300000  | 140000 |         |           |         |
| Ssc10_2_6 | 39410000  | 39440000  | 30000  |         |           |         |
| Ssc10_2_6 | 46230000  | 46370000  | 140000 | PLAUR   | PHLDB3    | LYPD3   |
| Ssc10_2_6 | 52330000  | 52440000  | 110000 | DPRX    | SLC7A3    |         |
| Ssc10_2_6 | 52750000  | 52810000  | 60000  | SLC7A3  |           |         |
| Ssc10_2_6 | 52820000  | 52830000  | 10000  |         |           |         |
| Ssc10_2_6 | 52840000  | 52860000  | 20000  |         |           |         |
| Ssc10_2_6 | 54270000  | 54290000  | 20000  | SYT5    | DNAAF3    |         |
| Ssc10_2_6 | 56310000  | 56400000  | 90000  | OR5R1   |           |         |
| Ssc10_2_6 | 56410000  | 56430000  | 20000  |         |           |         |
| Ssc10_2_6 | 112900000 | 112920000 | 20000  | FHOD3   |           |         |
| Ssc10_2_6 | 112940000 | 112950000 | 10000  |         |           |         |
| Ssc10_2_6 | 119350000 | 119370000 | 20000  |         |           |         |
| Ssc10_2_6 | 156300000 | 156310000 | 10000  |         |           |         |
| Ssc10_2_7 | 15550000  | 15560000  | 10000  |         |           |         |
| Ssc10_2_7 | 15640000  | 15660000  | 20000  |         |           |         |
| Ssc10_2_7 | 15690000  | 15700000  | 10000  |         |           |         |
| Ssc10_2_7 | 15840000  | 15850000  | 10000  |         |           |         |
| Ssc10_2_7 | 18890000  | 18900000  | 10000  |         |           |         |
| Ssc10_2_7 | 22950000  | 23000000  | 50000  |         |           |         |
| Ssc10_2_7 | 23010000  | 23060000  | 50000  |         |           |         |
| Ssc10_2_7 | 23660000  | 23710000  | 50000  | OR1F1   | OR2G6     |         |
| Ssc10_2_7 | 23870000  | 23990000  | 120000 | ZNF167  | ZNF192    | ZNF389  |
|           |           |           |        | ZNF165  | ZSCAN16   |         |
| Ssc10_2_7 | 24000000  | 24260000  | 260000 | ZNF323  | ZNF193    | NKAPL   |
|           |           |           |        | ZNF397  | ZKSCAN4   | PGBD1   |
|           |           |           |        | ZSCAN12 | OR2B11    | GPX5    |
|           |           |           |        | GPX6    |           |         |
| Ssc10_2_7 | 24270000  | 24360000  | 90000  | ZNF232  |           |         |
| Ssc10_2_7 | 24630000  | 24650000  | 20000  | SLA-3   |           |         |
| Ssc10_2_7 | 24760000  | 24780000  | 20000  | AFP     |           |         |
| Ssc10_2_7 | 24810000  | 25230000  | 420000 | RNF39   | TRIM15    | TRIM10  |
|           |           |           |        | TRIM40  | TRIM31    | PPP1R11 |
|           |           |           |        | ZNRD1   | C7H6ORF12 | KRAB    |
|           |           |           |        | MOG     | RNF39     | ZNRD1   |
|           |           |           |        | KRAB    | GABBR1    |         |
| Ssc10_2_7 | 25320000  | 25350000  | 30000  | UBD     |           |         |
| Ssc10_2_7 | 25360000  | 25390000  | 30000  | OR2G6   | OR2G3     | OR6Q1   |
| Ssc10_2_7 | 25450000  | 25700000  | 250000 | OR14J1  | OR12D2    | OR12D2  |

Supplementary table 2

|           |           |           |        |            |         |         |
|-----------|-----------|-----------|--------|------------|---------|---------|
|           |           |           |        | OR5V1      | OR14J1  |         |
| Ssc10_2_7 | 25740000  | 25750000  | 10000  | OR12D2     |         |         |
| Ssc10_2_7 | 25760000  | 25780000  | 20000  | OR12D3     | OR5V1   |         |
| Ssc10_2_7 | 26670000  | 26930000  | 260000 | C7H6orf136 | SLA-11  | TRIM39  |
|           |           |           |        | RPP21      | GNL1    | PRR3    |
|           |           |           |        | ABCF1      | PPP1R10 | MRPS18B |
|           |           |           |        | ATAT1      | DHX16   |         |
| Ssc10_2_7 | 28400000  | 28430000  | 30000  | C6orf10    |         |         |
| Ssc10_2_7 | 28530000  | 28540000  | 10000  |            |         |         |
| Ssc10_2_7 | 28660000  | 28680000  | 20000  |            |         |         |
| Ssc10_2_7 | 132350000 | 132380000 | 30000  |            |         |         |
| Ssc10_2_7 | 132390000 | 132500000 | 110000 |            |         |         |
| Ssc10_2_7 | 132640000 | 132680000 | 40000  | OR4F3      | OR4F16  | OR4F29  |
| Ssc10_2_8 | 8850000   | 8870000   | 20000  |            |         |         |
| Ssc10_2_8 | 9770000   | 9790000   | 20000  |            |         |         |
| Ssc10_2_8 | 10340000  | 10350000  | 10000  |            |         |         |
| Ssc10_2_8 | 13890000  | 13900000  | 10000  |            |         |         |
| Ssc10_2_8 | 14070000  | 14080000  | 10000  |            |         |         |
| Ssc10_2_8 | 14200000  | 14250000  | 50000  |            |         |         |
| Ssc10_2_8 | 14620000  | 14630000  | 10000  |            |         |         |
| Ssc10_2_8 | 16550000  | 16620000  | 70000  |            |         |         |
| Ssc10_2_8 | 25020000  | 25030000  | 10000  |            |         |         |
| Ssc10_2_8 | 29850000  | 29880000  | 30000  |            |         |         |
| Ssc10_2_8 | 30220000  | 30230000  | 10000  |            |         |         |
| Ssc10_2_8 | 92960000  | 92980000  | 20000  |            |         |         |
| Ssc10_2_8 | 98780000  | 98800000  | 20000  |            |         |         |
| Ssc10_2_8 | 103030000 | 103040000 | 10000  |            |         |         |
| Ssc10_2_8 | 103300000 | 103850000 | 550000 | LARP1B     | PGRMC2  | C4ORF29 |
|           |           |           |        | MFSD8      |         |         |
| Ssc10_2_8 | 104050000 | 104060000 | 10000  |            |         |         |
| Ssc10_2_8 | 104070000 | 104560000 | 490000 |            |         |         |
| Ssc10_2_8 | 105170000 | 105180000 | 10000  |            |         |         |
| Ssc10_2_8 | 105210000 | 105220000 | 10000  |            |         |         |
| Ssc10_2_8 | 105250000 | 105390000 | 140000 |            |         |         |
| Ssc10_2_8 | 107310000 | 107320000 | 10000  |            |         |         |
| Ssc10_2_8 | 109050000 | 109080000 | 30000  |            |         |         |
| Ssc10_2_8 | 120090000 | 120140000 | 50000  | ELOVL6     |         |         |
| Ssc10_2_8 | 144280000 | 144290000 | 10000  |            |         |         |
| Ssc10_2_8 | 144350000 | 144380000 | 30000  | HPSE       | HELQ    |         |
| Ssc10_2_8 | 145150000 | 145200000 | 50000  | HNRPD      |         |         |
| Ssc10_2_8 | 145210000 | 145230000 | 20000  | HNRNPD     |         |         |
| Ssc10_2_8 | 145870000 | 145900000 | 30000  |            |         |         |
| Ssc10_2_8 | 146150000 | 146240000 | 90000  | BMP3       |         |         |
| Ssc10_2_8 | 146660000 | 146690000 | 30000  | FGF5       |         |         |
| Ssc10_2_9 | 90000     | 110000    | 20000  |            |         |         |

Supplementary table 2

|           |          |          |        |         |         |        |
|-----------|----------|----------|--------|---------|---------|--------|
| Ssc10_2_9 | 230000   | 290000   | 60000  | TMEM41B |         |        |
| Ssc10_2_9 | 1650000  | 1730000  | 80000  | OR5R1   | OR5M10  | OR10A3 |
|           |          |          |        | OR10A6  |         |        |
| Ssc10_2_9 | 2360000  | 2370000  | 10000  | OR5P3   |         |        |
| Ssc10_2_9 | 3710000  | 3720000  | 10000  | URGCP   |         |        |
| Ssc10_2_9 | 5210000  | 5230000  | 20000  |         |         |        |
| Ssc10_2_9 | 5550000  | 5560000  | 10000  | OR52A5  |         |        |
| Ssc10_2_9 | 5890000  | 5910000  | 20000  | OR51H1P |         |        |
| Ssc10_2_9 | 6560000  | 6570000  | 10000  |         |         |        |
| Ssc10_2_9 | 6580000  | 6610000  | 30000  | OR52B4  |         |        |
| Ssc10_2_9 | 6630000  | 6660000  | 30000  | SSU72   | OR52B4  |        |
| Ssc10_2_9 | 6730000  | 6740000  | 10000  |         |         |        |
| Ssc10_2_9 | 13530000 | 13570000 | 40000  | KCTD14  |         |        |
| Ssc10_2_9 | 13610000 | 13620000 | 10000  |         |         |        |
| Ssc10_2_9 | 13670000 | 13680000 | 10000  |         |         |        |
| Ssc10_2_9 | 15740000 | 15750000 | 10000  |         |         |        |
| Ssc10_2_9 | 15950000 | 16000000 | 50000  |         |         |        |
| Ssc10_2_9 | 19310000 | 19330000 | 20000  | CCDC90B |         |        |
| Ssc10_2_9 | 23450000 | 23750000 | 300000 |         |         |        |
| Ssc10_2_9 | 23910000 | 23950000 | 40000  |         |         |        |
| Ssc10_2_9 | 24860000 | 24980000 | 120000 | GRM5    |         |        |
| Ssc10_2_9 | 25210000 | 25400000 | 190000 | NOX4    |         |        |
| Ssc10_2_9 | 25410000 | 25430000 | 20000  |         |         |        |
| Ssc10_2_9 | 25510000 | 25540000 | 30000  |         |         |        |
| Ssc10_2_9 | 25560000 | 25570000 | 10000  |         |         |        |
| Ssc10_2_9 | 26190000 | 26380000 | 190000 |         |         |        |
| Ssc10_2_9 | 26440000 | 26490000 | 50000  |         |         |        |
| Ssc10_2_9 | 26500000 | 26580000 | 80000  |         |         |        |
| Ssc10_2_9 | 32480000 | 32520000 | 40000  |         |         |        |
| Ssc10_2_9 | 32530000 | 32560000 | 30000  |         |         |        |
| Ssc10_2_9 | 32580000 | 32590000 | 10000  |         |         |        |
| Ssc10_2_9 | 32780000 | 32860000 | 80000  |         |         |        |
| Ssc10_2_9 | 33240000 | 33330000 | 90000  | ENY2    |         |        |
| Ssc10_2_9 | 33340000 | 33440000 | 100000 |         |         |        |
| Ssc10_2_9 | 33800000 | 33830000 | 30000  |         |         |        |
| Ssc10_2_9 | 34110000 | 34140000 | 30000  |         |         |        |
| Ssc10_2_9 | 34560000 | 34570000 | 10000  |         |         |        |
| Ssc10_2_9 | 35080000 | 35150000 | 70000  | CNTN5   |         |        |
| Ssc10_2_9 | 35660000 | 35670000 | 10000  |         |         |        |
| Ssc10_2_9 | 35930000 | 35980000 | 50000  |         |         |        |
| Ssc10_2_9 | 35990000 | 36020000 | 30000  |         |         |        |
| Ssc10_2_9 | 37510000 | 37860000 | 350000 | DYNC2H1 | DCUN1D5 |        |
| Ssc10_2_9 | 43410000 | 43450000 | 40000  |         |         |        |
| Ssc10_2_9 | 92780000 | 92800000 | 20000  |         |         |        |
| Ssc10_2_9 | 94860000 | 94950000 | 90000  | AGR3    |         |        |

Supplementary table 2

|           |           |           |        |                 |
|-----------|-----------|-----------|--------|-----------------|
| Ssc10_2_9 | 94960000  | 94990000  | 30000  |                 |
| Ssc10_2_9 | 95150000  | 95570000  | 420000 | AHR             |
| Ssc10_2_9 | 95830000  | 95870000  | 40000  |                 |
| Ssc10_2_9 | 96020000  | 96120000  | 100000 |                 |
| Ssc10_2_9 | 96220000  | 96380000  | 160000 | ACBD5           |
| Ssc10_2_9 | 97150000  | 97160000  | 10000  |                 |
| Ssc10_2_9 | 97820000  | 97860000  | 40000  |                 |
| Ssc10_2_9 | 97890000  | 98210000  | 320000 | TMEM196 TWISTNB |
| Ssc10_2_9 | 98220000  | 98240000  | 20000  |                 |
| Ssc10_2_9 | 99880000  | 99940000  | 60000  | DNAH11          |
| Ssc10_2_9 | 100050000 | 100070000 | 20000  |                 |
| Ssc10_2_9 | 119600000 | 119610000 | 10000  |                 |
| Ssc10_2_9 | 125520000 | 125530000 | 10000  |                 |
| Ssc10_2_9 | 142330000 | 142350000 | 20000  |                 |
| Ssc10_2_9 | 142680000 | 142690000 | 10000  |                 |
| Ssc10_2_9 | 143230000 | 143260000 | 30000  |                 |

**Supplementary Vable 2. Overview of introgressed regions in the Large white genome.** Regions in the genome where Asian introgression is most pronounced ( $ZrIBD > 2$ ) and the genes within these regions are listed. "Start" represents the startbin of 10.000bp and length indicates how long the stetch within the region of inferred introgression is.
